# Supplementary material
Source: PubMed Central journal article supplement (PMC7783751)
Supplement: ajcr0010-4325-f8.pdf [file ajcr0010-4325-f8.pdf]

## The role of CDK6 in tumor microenvironment

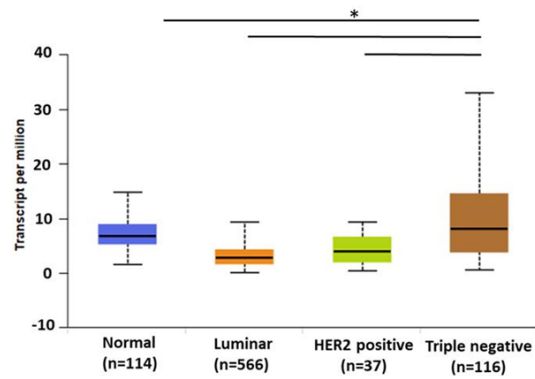

**Figure S1.** The CDK6 expression was further evaluated by the UALCAN database according to different subtypes. The number in parentheses indicates sample size in each group. \*P < 0.05, as compared between each group.

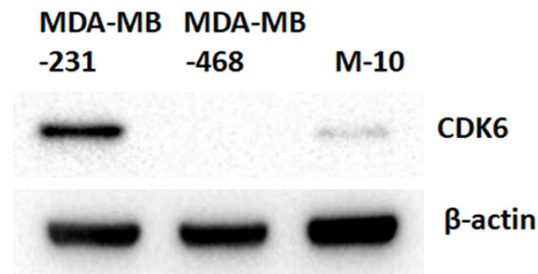

**Figure S2.** Expression of CDK6 in normal human mammary epithelial cell (M10) and two TNBC cell lines (MDA-MB-231 and MDA-MB-468). Cell lysates were immunoblotted by anti-CDK6. Actin was used as a loading control. Experiments were performed independently at least three times.

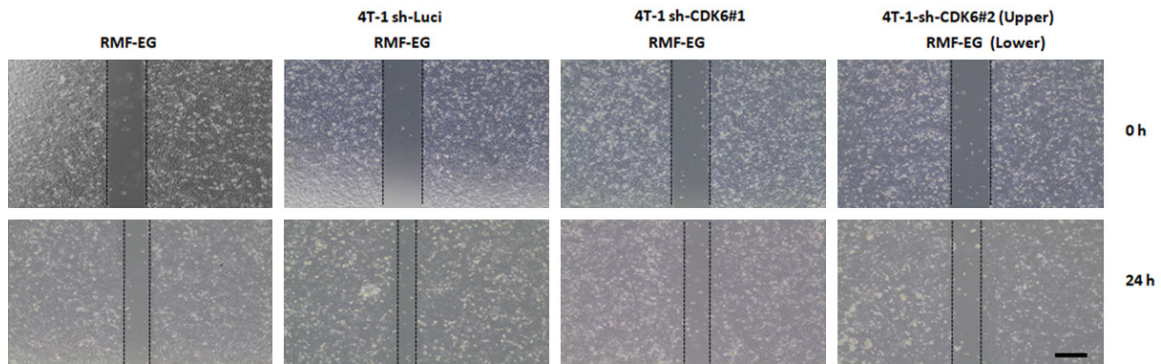

**Figure S3.** The migration of fibroblast was performed in co-culture with 4T1 and CDK6-deficient 4T1 cells. 40,000 RMF-EG cells were seeded onto 24-well plates in 500  $\mu$ L Dulbecco's modified Eagle's medium (DMEM). Additionally, 40,000 4T1 or 4T1 sh-CDK6 pooling cells were seeded onto 0.2  $\mu$ m Transwell inserts with 100  $\mu$ L DMEM and co-cultured with RMF-EG cells for 48 h. Migration of RMF-EG cells into the scratch wound after 24 h was analyzed. Original magnification: 40  $\times$ , scale bar: 500  $\mu$ m.

## The role of CDK6 in tumor microenvironment

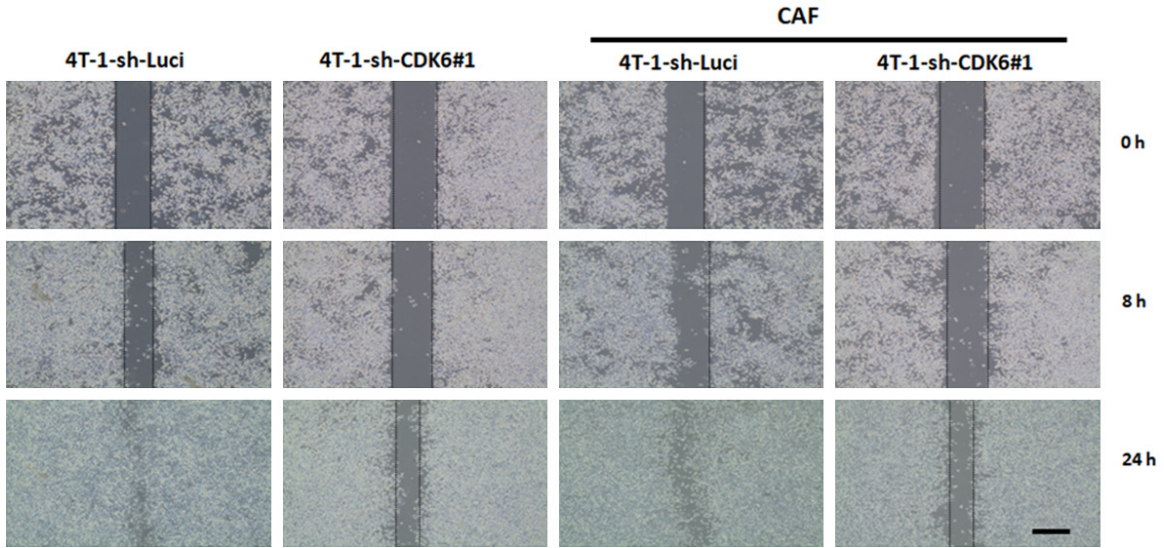

**Figure S4.** The migration of 4T1 was performed in co-culture with CAF cells. 40,000 4T1 or 4T1 sh-CDK6 pooling cells were seeded onto 24-well plates in 500  $\mu$ L DMEM. Additionally, 40,000 cancer-associated fibroblasts were seeded onto 0.2  $\mu$ m Transwell inserts in 100  $\mu$ L DMEM and co-cultured with RMF-EG cells for 48 h. Migration of 4T1 or 4T1 sh-CDK6 pooling cells into the scratch wound after 8 h and 24 h was analyzed. Original magnification: 40  $\times$ , scale bar: 500  $\mu$ m.

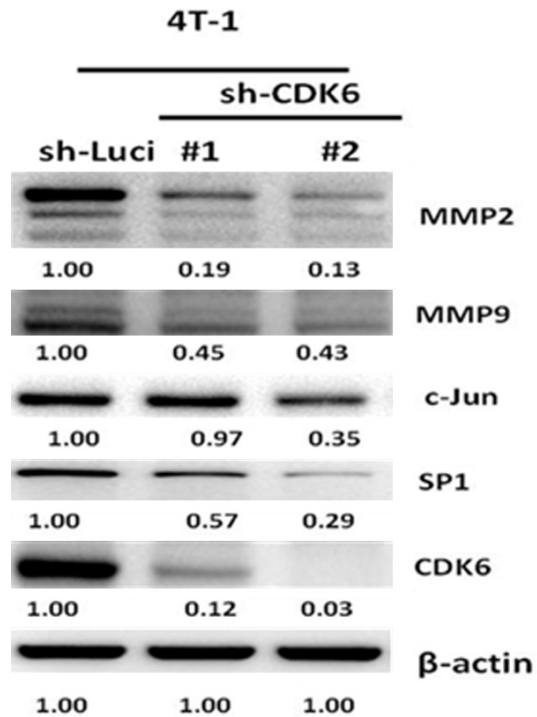

**Figure S5.** Protein expression levels of CDK6, c-Jun, Sp1, MMP-2, and MMP-9 in 4T1 and 4T1 sh-CDK6 pooling cells were determined by western blotting.

The role of CDK6 in tumor microenvironment

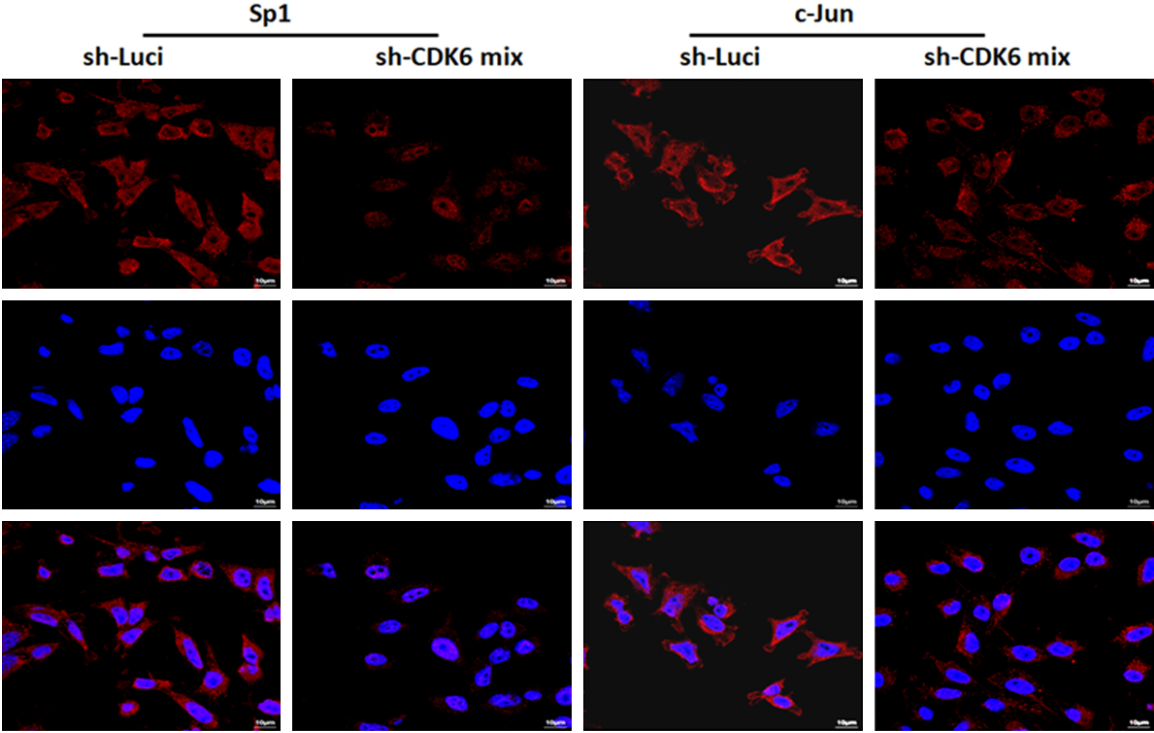

**Figure S6.** Immunohistochemistry confirmed nuclear translocation of c-Jun and Sp1 in 4T1 and 4T1 sh-CDK6 pooling cells.
